# Supplementary material for: From Stigma to Support: Exploring Youth Views on STI Partner Notification in Maseru, Lesotho
Source: Research Square preprint supplement (doi:10.21203/rs.3.rs-8436597/v1), 2026-01-19
Supplement: Supplementary file 1 [file 8061a92823268f446ccb03a7.docx]

**Table 1.: Youth Focus Group Guide**

| **Research Question 1:** **What are youths' perceptions on partner(s) notification strategies for control of curable STIs in Lesotho?** |
| --- |
| 1. What are your views about curable STIs partner(s) notification in Lesotho?   **Probe**  a) What have you heard about STIs partner(s) notification services?  b) What do you think about those services?  c) What do you think are the benefits of STIs partner(s) notification services?  d) What do you think are the disadvantages of partner(s) notification services? |
| 2. If you are diagnosed with curable STIs, would you invite the sexual partner (s) to go for curable STI partner services at a health facility?  **Probe:**  a) What would motivate you to invite partner(s) to go for curable STI partner services?  b) How would you notify your partner of the need to receive curable STIs partner(s) notification in Lesotho? Would you **prefer client,** **provider**, **contract**, **expedited treatment** or **dual referral**?  c) If notified as a partner would you seek treatment? |
| **Research Question 2: What are the social dynamics on partner(s) notification strategies for control of curable STIs in Lesotho among youth?** |
| 1. What have you observed or heard about STIs among couples in the community?   **Probe:**   1. How do couples manage STI in the community? 2. How do adolescents handle STI issues in their relationships? 3. Where do you seek help if you realize you have STIs? 4. How soon do you seek help when you have STIs?   2. What kind of advice do people give each other about STIs treatment?  **Probe:**   1. What kind of medicines do you go for when you feel changes in your genitals?   b) What do the medicines help with?  c) What do you do if you do not get healed from the medicines you mentioned?  d) What made you decide to start with alternative medicine before consulting the medical services?  e) While taking the alternative medicine do you tell and share with your partner about it?  f) While taking the STI treatment how do you explain to the partner what is the treatment for?  g) How easy do you find it to show and share with your partner/s?  h) How easy would you request the health care provider to provide the treatment to partner/s? |
